# Supplementary material for: CBOL Protist Working Group: Barcoding Eukaryotic Richness beyond the Animal, Plant, and Fungal Kingdoms
Source: PLoS Biol. 2012 Nov 6;10(11):e1001419. doi: 10.1371/journal.pbio.1001419 (PMC3491025; doi:10.1371/journal.pbio.1001419)
Supplement: Table S1 — Number of catalogued morphospecies and V4 18S rDNA OTU-97% among the 60 main eukaryotic lineages. (PDF) [file pbio.1001419.s001.pdf]

**Supplementary table 1.** Number of catalogued morphospecies and V4 18S rDNA OTU-97% amongst the 60 main eukaryotic lineages.

| Supergroup     | Division/Phylum              | Catalogued morpho-species | OTU (V4 rDNA, 97%)* |
|----------------|------------------------------|---------------------------|---------------------|
| ALVEOLATA      | Apicomplexa                  | 6000                      | 626                 |
|                | Ciliophora                   | 8000                      | 1157                |
|                | Dinophyceae                  | 2280                      | 426                 |
|                | Ellobiopsidae                | 6                         | 2                   |
|                | Perkinsea                    | 0                         | 28                  |
|                | Syndiniales                  | 0                         | 391                 |
|                | Chromera                     | 1                         | 1                   |
| AMOEBOZOA      | Tubulinea + Arcellinida      | 1100                      | 58                  |
|                | Discosea                     | 180                       | 77                  |
|                | Variosea                     | 20                        | 28                  |
|                | Lobosa incertae sedis        | 0                         | 60                  |
|                | Protostelia                  | 32                        |                     |
|                | Dictyostelia + Myxogastria   | 1062                      | 107                 |
|                | Breviatea                    | 12                        | 13                  |
| ARCHAEPLASTIDA | Chlorophyta (- Streptophyta) | 9000                      | 740                 |
|                | Streptophyta                 | 350000                    | 1447                |
|                | Glaucocystophyta             | 5                         | 4                   |
|                | Rhodophyta                   | 5000                      | 640                 |
| EXCAVATA       | Euglenozoa                   | 1520                      | 296                 |
|                | Fornicata                    | 146                       | 45                  |
|                | Heterolobosea                | 80                        | 640                 |
|                | Jakobida                     | 10                        | 13                  |
|                | Malawimonadidae              | 3                         | 1                   |
|                | Parabasalia                  | 466                       | 180                 |
|                | Preaxostyla                  | 96                        | 22                  |
| OPISTHOKONTA   | Choanoflagellida             | 250                       | 88                  |
|                | Fungi                        | 377200                    | 3694                |
|                | Mesomycetozoea               | 47                        | 56                  |
|                | Metazoa                      | 1200000                   | 8750                |
| RHIZARIA       | Cercozoa                     | 600                       | 749                 |
|                | Foraminifera                 | 12000                     | 36                  |
|                | Acantharea                   | 160                       | 36                  |
|                | Polycystinea                 | 850                       | 91                  |
|                | other Radiolaria             | 1                         | 39                  |
| STRAMENOPILES  | Bacillariophyta              | 20000                     | 603                 |
|                | Bicoecea                     | 72                        | 80                  |
|                | Bolidophyceae and relatives  | 0                         | 15                  |
|                | Chrysophyceae-Synurophyceae  | 1200                      | 273                 |
|                | Dictyochophyceae             | 15                        | 45                  |
|                | Eustigmatophyceae            | 15                        | 12                  |
|                | Hyphochytriomyceta           | 25                        | 3                   |
|                | Labyrinthulea                | 40                        | 186                 |
|                | MAST                         | 0                         | 94                  |
|                | Oomycota                     | 676                       | 66                  |
|                | Opalinata                    | 400                       | 53                  |
|                | Pelagophyceae                | 12                        | 22                  |
|                | Phaeophyceae                 | 1750                      | 49                  |
|                | Phaeothamniophyceae          | 25                        | 4                   |
|                | Picophagea                   | 0                         | 0                   |
|                | Pinguiphyceae                | 5                         | 7                   |
|                | Pirsonia                     | 0                         | 7                   |
|                | Raphidophyceae               | 20                        | 10                  |
|                | Xanthophyceae                | 600                       | 28                  |
| INCERTAE SEDIS | Apusomonadidae               | 12                        | 24                  |
|                | Centrohelioczoa              | 150                       | 71                  |
|                | Cryptophyta                  | 70                        | 90                  |

|  |                     |     |     |
|--|---------------------|-----|-----|
|  | Haptophyta          | 350 | 127 |
|  | Hilomonadea         | 0   | 7   |
|  | Katablepharidophyta | 9   | 15  |
|  | Picobiliphyta       | 0   | 12  |
|  | Telonemia           | 0   | 31  |

\* OTU-97% found in the *Genbank nt* and *env\_nt* divisions of Genbank (jan 2012). Total of 86,587 sequences.
